# Supplementary material for: High FoxP3 expression in tumour cells predicts better survival in gastric cancer and its role in tumour microenvironment
Source: PubMed Central journal article supplement — Br J Cancer. 2014 Feb 18;110(6):1552–60. doi: 10.1038/bjc.2014.47 (PMC3960619; doi:10.1038/bjc.2014.47), 2014-02-18
Supplement: bjc201447x2.pdf [file bjc201447x2.pdf]

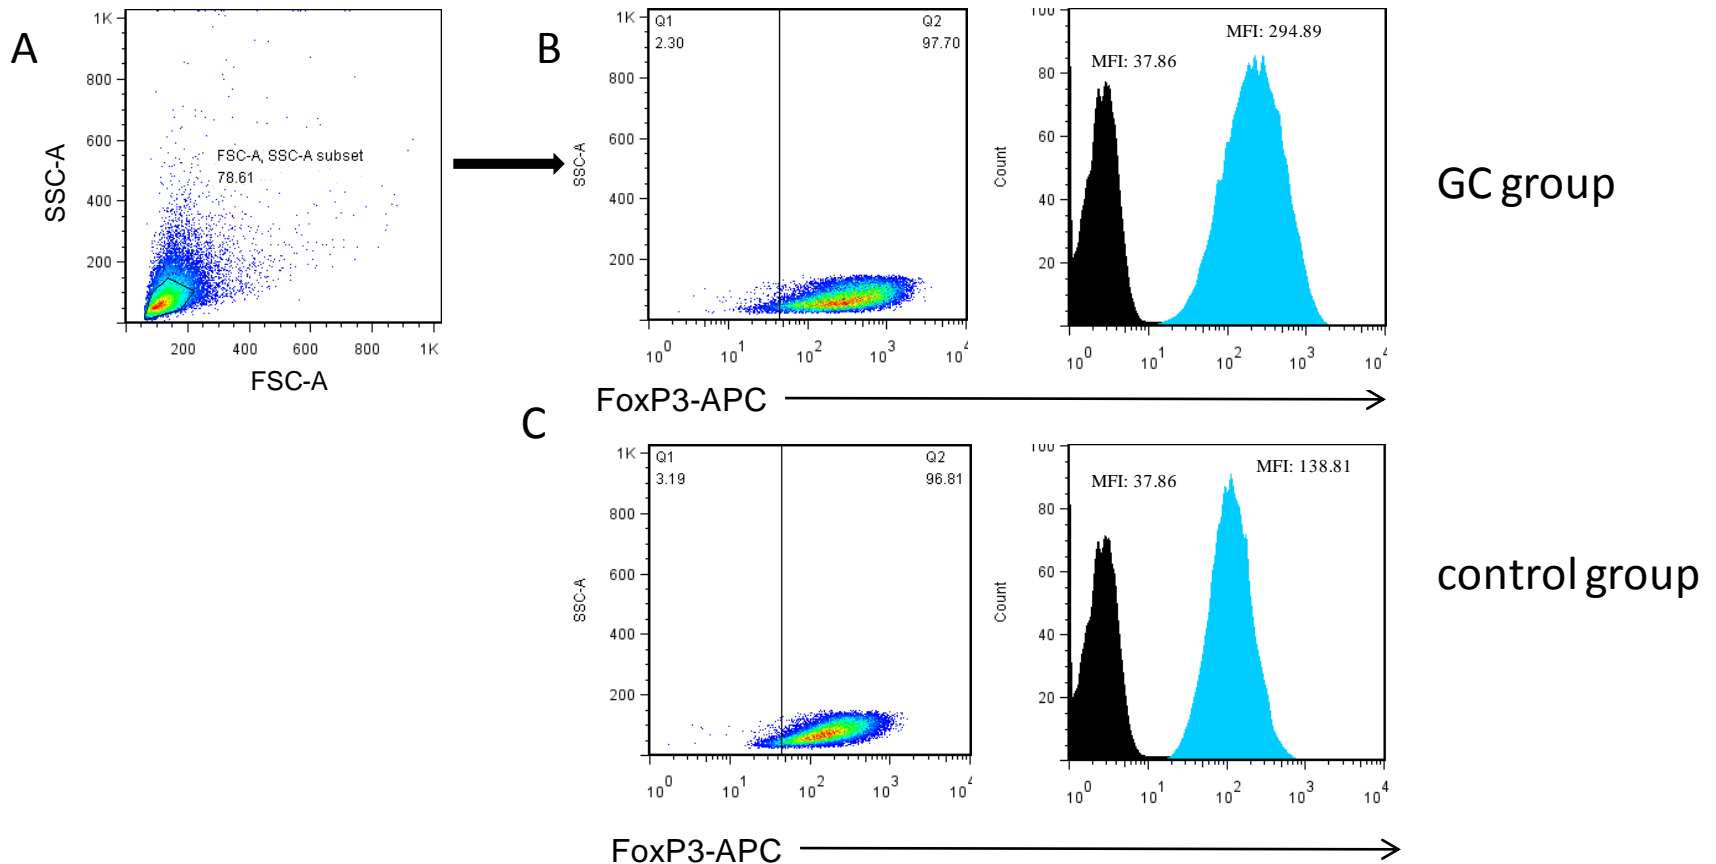

**Figure S2:** **A**, plots show the gating strategy for lymphocytes. **B**, mean fluorescence intensity (MFI) of FoxP3 in lymphocytes of gastric cancer patients and healthy controls detected by flow cytometry. Actual MFI = the MFI of cells stained with anti-FoxP3 mAb (blue area) minus the MFI of isotype stained controls (black area). MFI in lymphocytes of patient with gastric cancer, MFI=257.03. **C**, MFI in lymphocytes of healthy control, MFI=100.95.
